# Supplementary material for: Breast Cancer Brain Metastasis—Overview of Disease State, Treatment Options and Future Perspectives
Source: PubMed Central journal article supplement (PMC7959316; doi:10.3390/cancers13051078), 2021-03-03
Supplement: cancers-13-01078-s001.pdf [file cancers-13-01078-s001.pdf]

**Table S1.** Clinical trials in local treatment for BCBM

| <b>Local treatment for BCBM</b>               |                                                                                                                                               |                                  |                  |                                          |                               |                                    |
|-----------------------------------------------|-----------------------------------------------------------------------------------------------------------------------------------------------|----------------------------------|------------------|------------------------------------------|-------------------------------|------------------------------------|
| <b>Treatment</b>                              | <b>Patients' population</b>                                                                                                                   | <b>Trial name (NCT number)</b>   | <b>Phase</b>     | <b>Estimated primary completion date</b> | <b>Status</b>                 | <b>Primary endpoint</b>            |
| Preoperative SRS vs Postoperative SRS         | BMs under 4 cm for single fraction, and over 7 cm for multifraction therapy                                                                   | (NCT03741673)                    | III              | July 10, 2022                            | Recruiting                    | LMD-free rate                      |
| Preoperative SRS                              | 1–6 BMs (2–4cm)                                                                                                                               | (NCT03368625)                    | II               | January 1, 2022                          | Recruiting                    | Radiation toxicity                 |
| WBRT vs HA-WBRT                               | New BM which at least 2 BMs are under 40 mmm, and the distance from the border of a mass to the hippocampal margin should be more than 15 mm. | (NCT03002532)                    | (Not Applicable) | August, 2017                             | Unknown                       | Neurocognitive function            |
| SRS with WBRT versus SRS without WBRT         | 5–20 BMs                                                                                                                                      | (NCT03775330)                    | Not applicable   | December, 2020                           | Not yet recruiting            | Neurocognitive function            |
| WBRT with memantine vs WBRT without memantine | Pathologically proven BMs                                                                                                                     | (NCT00566852)                    | III              | April, 2011                              | Published by Brown et al. [1] | Cognitive function                 |
| WBRT vs HA-WBRT                               | New BM which at least 2 BMs are under 40 mmm, and the distance from the border of a mass to the hippocampal margin should be more than 15 mm. | (NCT03002532)                    | (Not Applicable) | August, 2017                             | Unknown                       | Neurocognitive function            |
| HA-WBRT plus memantine vs WBRT plus memantine | BMs outside a 5-mm margin around either hippocampus                                                                                           | NRG Oncology CC001 (NCT02360215) | III              | April 30, 2018                           | Published by Brown et al. [2] | Time to cognitive function failure |
| SRS vs HA-WBRT plus memantine                 | 5–15 BMs                                                                                                                                      | (NCT03550391)                    | III              | December 31, 2021                        | Recruiting                    | OS, Neurocognitive PFS             |

|      |                             |               |    |            |            |                                       |
|------|-----------------------------|---------------|----|------------|------------|---------------------------------------|
| FSRT | 1 to 10 HER2-positive BCBMs | (NCT04061408) | II | July, 2021 | Recruiting | Intracranial local tumor control rate |
|------|-----------------------------|---------------|----|------------|------------|---------------------------------------|

**Abbreviations:** BM, brain metastasis; BCBM, breast cancer brain metastasis; SRS, stereotactic radio surgery; WBRT, whole brain radiation therapy; HA-WBRT, hippocampal-avoidance whole brain radiation therapy; FSRT, fractionated stereotactic radiotherapy; OS, overall survival; PFS, progression free survival; LMD, leptomeningeal disease

**Table S2.** Clinical trials in systemic therapy for BCBM

| <b>Systemic therapy for HER2-positive BCBM</b>                                                 |                                                                                   |                                   |              |                                          |                                  |                                                                         |
|------------------------------------------------------------------------------------------------|-----------------------------------------------------------------------------------|-----------------------------------|--------------|------------------------------------------|----------------------------------|-------------------------------------------------------------------------|
| <b>Treatment</b>                                                                               | <b>Patients' population</b>                                                       | <b>Trial name (NCT number)</b>    | <b>Phase</b> | <b>Estimated primary completion date</b> | <b>Status</b>                    | <b>Primary endpoint</b>                                                 |
| Intra-arterial cerebral infusion of trastuzumab                                                | HER2-positive BCBM                                                                | (NCT02571530)                     | I            | September, 2022                          | Recruiting                       | MTD, adverse events and dose-limiting toxicities                        |
| Lapatinib plus capecitabine vs capecitabine                                                    | Advanced BC with progression on trastuzumab                                       | (NCT00078572)                     | III          | April, 2006                              | Published by Cameron et al. [3]  | Time to progression                                                     |
| Lapatinib plus capecitabine vs lapatinib plus topotecan                                        | HER2-positive BC with progressive BCBM after trastuzumab and cranial radiotherapy | (NCT00437073)                     | II           | January, 2009                            | Published by Lin et al. [4]      | CNS objective response                                                  |
| Lapatinib plus taxane followed by lapatinib vs trastuzumab plus taxane followed by trastuzumab | HER2-positive MBC without BM                                                      | NCIC CTG MA.31 (NCT00667251)      | III          | August 1, 2012                           | Published by Gelmon et al. [5]   | PFS                                                                     |
| Lapatinib plus capecitabine vs trastuzumab plus capecitabine                                   | HER2-positive MBC without BM                                                      | CEREBEL (EGF111438) (NCT00820222) | III          | June 11, 2012                            | Published by Pivot et al. [6]    | Incidence of CNS metastases as first site of relapse                    |
| Intermittent high-dose Lapatinib plus capecitabine                                             | HER2-positive BCBM                                                                | (NCT02650752)                     | I            | January 22, 2021                         | Published by Morikawa et al.[7]  | MTD                                                                     |
| Lapatinib plus everolimus plus capecitabine                                                    | HER2-positive BCBM                                                                | TRIO-US B-09 (NCT01783756)        | I/II         | May 10, 2019                             | Published by Hurvitz et al. [8]. | CNS ORR                                                                 |
| Lapatinib plus WBRT/SRS vs WBRT/SRS                                                            | HER2-positive BCBM                                                                | (NCT01622868)                     | II           | December 30, 2019                        | Reported by Kim et al.[9]        | CR rate in the measurable BM                                            |
| Lapatinib plus WBRT                                                                            | BM from HER2-positive BC or lung cancer                                           | (NCT01218529)                     | II           | August, 2014                             | Completed                        | Response rate in brain as assessed by volumetric analysis of brain MRI. |
| Pertuzumab plus high-dose trastuzumab                                                          | HER2-positive progressive BCBM after radiotherapy                                 | PATRICIA (NCT02536339)            | II           | May 1, 2019                              | Ongoing                          | Percentage of participants with objective response in the CNS           |

|                                                                                                                                |                                                                          |                       |      |                   |                                             |                                                                                                                              |
|--------------------------------------------------------------------------------------------------------------------------------|--------------------------------------------------------------------------|-----------------------|------|-------------------|---------------------------------------------|------------------------------------------------------------------------------------------------------------------------------|
| Intrathecal pertuzumab and trastuzumab                                                                                         | New untreated asymptomatic or low symptomatic HER2-positive BCBM         | (NCT02598427)         | I    | February 22, 2018 | Terminated (Inadequate enrollment)          | Safety, MTD                                                                                                                  |
| T-DM1 alone vs T-DM1 plus metronomic temozolomide                                                                              | HER2-positive BCBM treated with SRS                                      | (NCT03190967)         | I/II | June 30, 2022     | Recruiting                                  | MTD of temozolomide when used with T-DM1, Median amount of time subject survives without disease progression after treatment |
| Afatinib vs afatinib plus 2Gy radiotherapy vs afatinib plus 4Gy radiotherapy                                                   | BM from BC or lung cancer                                                | (NCT02768337)         | I/II | June, 2021        | Recruiting                                  | Ratio of afatinib concentration in resected BM / plasma                                                                      |
| Tucatinib plus T-DM1                                                                                                           | HER2-positive MBC                                                        | (NCT01983501)         | I    | October 10, 2017  | Published by Borges et al. [10]             | Incidence of adverse events                                                                                                  |
| Neratinib                                                                                                                      | Stage II to IIIC HER-2 positive breast cancer with node positive disease | ExteNET (NCT00878709) | III  | August 21, 2014   | Published by Chan et al. [11]               | Invasive disease-free survival at year 2                                                                                     |
| Pyrotinib plus vinorelbine                                                                                                     | HER2-positive BCBM                                                       | (NCT03933982)         | II   | December 22, 2021 | Recruiting                                  | ORR of CNS                                                                                                                   |
| Pyrotinib plus capecitabine                                                                                                    | HER2-positive BCBM                                                       | (NCT03691051)         | II   | November 20, 2019 | Unknown                                     | ORR of CNS                                                                                                                   |
| Pyrotinib plus temozolomide (for HER2-positive BCBM), SHR1316 and bevacizumab plus cisplatin or carboplatin (for TN type BCBM) | HER2-positive or TN-type BCBM                                            | (NCT04303988)         | II   | December 30, 2021 | Not yet recruiting                          | ORR in CNS                                                                                                                   |
| GRN1005 (paclitaxel trevatide) vs GRN1005 plus trastuzumab                                                                     | HER2-positive BCBM                                                       | GRABM-B (NCT01480583) | II   | June, 2015        | Completed and reported by Bates et al. [12] | ORR in CNS                                                                                                                   |
| GDC-0084 plus trastuzumab                                                                                                      | HER2-positive BCBM                                                       | (NCT03765983)         | II   | November 30, 2021 | Recruiting                                  | Overall response rate in the CNS, and                                                                                        |

|                                                              |                                                           |               |    |                   |                                        |                                                                                                                                              |
|--------------------------------------------------------------|-----------------------------------------------------------|---------------|----|-------------------|----------------------------------------|----------------------------------------------------------------------------------------------------------------------------------------------|
|                                                              |                                                           |               |    |                   |                                        | evaluation of the correlation between inhibition of p-4EBP1 in resected BM and intracranial response in the corresponding PDX models of BCBM |
| Palbociclib plus trastuzumab                                 | HR-negative/HER2-positive BCBM                            | (NCT02774681) | II | February 13, 2019 | Terminated (Slow accrual)              | RRR in CNS                                                                                                                                   |
| Palbociclib plus trastuzumab plus lapatinib plus fulvestrant | ER-positive/HER2-positive BCBM                            | (NCT04334330) | II | July, 2021        | Not yet recruiting                     | ORR in CNS                                                                                                                                   |
| Everolimus plus vinorelbine plus trastuzumab                 | HER2-positive BCBM                                        | (NCT01305941) | II | August, 2016      | Published by Van Swearingen et al.[13] | ORR in CNS                                                                                                                                   |
| HER2-CAR T cells                                             | HER2-positive recurrent BCBM or leptomeningeal metastases | (NCT03696030) | I  | August 31, 2021   | Recruiting                             | Incidence of DLTs, number of adverse events                                                                                                  |
| HER2-specific T cells (HER2-CAR T cells)                     | HER2-positive BCBM                                        | (NCT02442297) | I  | February, 2021    | Recruiting                             | Number of patients with DLTs                                                                                                                 |
| Atezolizumab plus pertuzumab plus trastuzumab                | HER2-positive BCBM                                        | (NCT03417544) | II | February, 2021    | Active, not recruiting                 | ORR in CNS                                                                                                                                   |

### Systemic therapy for luminal-type BCBM

| Treatment                                                                       | Patients' population                                 | Trial name (NCT number) | Phase | Estimated primary completion date | Status                                        | Primary endpoint       |
|---------------------------------------------------------------------------------|------------------------------------------------------|-------------------------|-------|-----------------------------------|-----------------------------------------------|------------------------|
| Everolimus plus exemestane vs everolimus alone vs capecitabine alone            | HR-positive locally advanced, recurrent or MBC       | BOLERO-6 (NCT01783444)  | II    | July 2, 2018                      | Published by Jerusalem et al. [14]            | PFS                    |
| Abemaciclib or PI3K inhibitor GDC-0084 or entrectinib, selected by genetic test | New or progressive BM                                | (NCT03994796)           | II    | July, 2021                        | Recruiting                                    | ORR in CNS             |
| Ribociclib (LEE011) plus buparlisib (BKM120) plus fulvestrant vs ribociclib     | Postmenopausal women with HR-positive/HER2-negative, | (NCT02088684)           | I/II  | April 17, 2018                    | Completed and reported by Tolaney et al. [15] | Incidence of DLTs, PFS |

| plus alpelisib (BYL719) plus fulvestrant vs ribociclib plus fulvestrant                                                                                                       | locally recurrent or advanced MBC                                                |                                        |              |                                          |                                                        |                                                                                                                                   |
|-------------------------------------------------------------------------------------------------------------------------------------------------------------------------------|----------------------------------------------------------------------------------|----------------------------------------|--------------|------------------------------------------|--------------------------------------------------------|-----------------------------------------------------------------------------------------------------------------------------------|
| Buparlisib (BKM120) plus fulvestrant vs fulvestrant                                                                                                                           | HR-positive / HER2-negative, locally advanced or MBC, with postmenopausal status | BELLE-2 (NCT01610284)                  | III          | April 20, 2015                           | Published by Baselga et al. [16]                       | PFS                                                                                                                               |
| Buparlisib (BKM120) plus capecitabine (plus trastuzumab for HER2 positive group)                                                                                              | BCBM (including all subtype)                                                     | (NCT02000882)                          | II           | March 29, 2019                           | Completed                                              | CBR                                                                                                                               |
| Alpelisib (BYL719) plus capecitabine vs buparlisib (BKM120) plus capecitabine vs buparlisib plus capecitabine plus trastuzumab vs buparlisib plus capecitabine plus lapatinib | MBC including BCBM                                                               | (NCT01300962)                          | I            | February 7, 2017                         | Published by McRee et al. [17]                         | MTD, DLT                                                                                                                          |
| <b>Systemic therapy for triple negative BCBM</b>                                                                                                                              |                                                                                  |                                        |              |                                          |                                                        |                                                                                                                                   |
| <b>Treatment</b>                                                                                                                                                              |                                                                                  | <b>Trial name (NCT number)</b>         | <b>Phase</b> | <b>Estimated primary completion date</b> | <b>Status</b>                                          | <b>Primary endpoint</b>                                                                                                           |
| Pembrolizumab plus SRS                                                                                                                                                        | BCBM (including all subtype)                                                     | (NCT03449238)                          | I/II         | December 30, 2024                        | Recruiting                                             | Tumor response for non-irradiated brain lesions at 8 weeks, correlation of absopal responses with the radiation dose received, OS |
| Pembrolizumab vs chemotherapy (treatment of physician's choice)                                                                                                               | Metastatic TNBC                                                                  | NK-3475-119/KEY-NOTE-119 (NCT02555657) | III          | April 11, 2019                           | Completed                                              | OS                                                                                                                                |
| Pembrolizumab plus paclitaxel vs pembrolizumab plus nab-paclitaxel vs pembrolizumab plus                                                                                      | Previously untreated locally recurrent inoperable BC or metastatic TNBC          | MK-3475-355/KEY-NOTE-355 (NCT02819518) | III          | January 12, 2022                         | Active, not recruiting. Reported by Cortes et al. [18] | Adverse event, PFS, OS                                                                                                            |

|                                                                                                        |                                                                                                 |                            |     |                    |                                                         |                                                                                                                                         |
|--------------------------------------------------------------------------------------------------------|-------------------------------------------------------------------------------------------------|----------------------------|-----|--------------------|---------------------------------------------------------|-----------------------------------------------------------------------------------------------------------------------------------------|
| gemcitabine/carboplatin vs pembrolizumab plus chemotherapy vs chemotherapy                             |                                                                                                 |                            |     |                    |                                                         |                                                                                                                                         |
| Atezolizumab plus SRS                                                                                  | TN-type BCBM                                                                                    | (NCT03483012)              | II  | September 30, 2021 | Active, not recruiting                                  | PFS                                                                                                                                     |
| Atezolizumab plus paclitaxel vs paclitaxel alone                                                       | Previously untreated locally advanced or metastatic TNBC                                        | IMpassion131 (NCT03125902) | III | November 15, 2019  | Active, not recruiting<br>Reported by Miles et al. [19] | PFS                                                                                                                                     |
| Atezolizumab plus chemotherapy (pegylated liposomal doxorubicin plus cyclophosphamide) vs chemotherapy | Locally advanced, or metastatic TNBC                                                            | ALICE (NCT03164993)        | II  | August 1, 2021     | Recruiting                                              | Toxicity, PFS                                                                                                                           |
| Nivolumab plus SRS                                                                                     | BCBM (including all subtype)                                                                    | (NCT03807765)              | I   | September 8, 2020  | Active, not recruiting                                  | Number of participants who experience DLTs                                                                                              |
| Neoadjuvant nivolumab plus ipilimumab vs none prior to surgery                                         | 1 to 3 untreated, at least surgically-resectable, solid tumor BM                                | (NCT04434560)              | II  | January, 2023      | Recruiting                                              | Proportion of patients that receive neoadjuvant ipilimumab and nivolumab prior to surgery and SRS, proliferation of circulating T-cells |
| Sorafenib plus WBRT                                                                                    | BCBM (including all subtype)                                                                    | (NCT01724606)              | I   | November, 2021     | Active, not recruiting                                  | MTD, toxicity by the number of adverse events                                                                                           |
| AZD1390 plus radiation therapy                                                                         | Primary brain tumor or BM                                                                       | (NCT03423628)              | I   | February 17, 2023  | Recruiting                                              | Incidence of DLTs, incidence of adverse events and serious adverse events                                                               |
| Etirinotecan pegol (NKTR-102) vs physician's treatment of choice                                       | Locally recurrent BC or MBC previously treated with an anthracycline, a taxane and capecitabine | BEACON (NCT01492101)       | III | April, 2016        | Published by Cortés et al. [20]                         | OS                                                                                                                                      |
| Erinotecan pegol (NKTR-102) vs physician's treatment of choice                                         | Stable BCBM previously treated with an anthracycline, a taxane and capecitabine                 | ATTAIN (NCT02915744)       | III | July, 2020         | Published by Tripathy et al. [21]                       | OS                                                                                                                                      |
| Nanoliposomal irinotecan                                                                               | BCBM                                                                                            | (NCT03328884)              | II  | October 15,        | Recruiting                                              | ORR in CNS                                                                                                                              |

|                                                                                     |                                                                                        |                                   |      |                  |                                                             |                                        |
|-------------------------------------------------------------------------------------|----------------------------------------------------------------------------------------|-----------------------------------|------|------------------|-------------------------------------------------------------|----------------------------------------|
|                                                                                     | (including all subtype)                                                                |                                   |      | 2022             |                                                             |                                        |
| Veliparib (ABT-888) plus carboplatin plus paclitaxel vs carboplatin plus paclitaxel | HER2-negative metastatic or locally advanced unresectable BC with <i>BRCA</i> mutation | BROCADE3 (NCT02163694)            | III  | April 5, 2019    | Published by Diéras et al. [22]                             | PFS                                    |
| Cisplatin plus veliparib vs cisplatin alone                                         | Recurrent or Metastatic TNBC, including BM                                             | SWOG S1416 (NCT02595905)          | II   | October 31, 2021 | Active, not recruiting<br>Reported by Sharma et al. [23]    | PFS                                    |
| Talazoparib (BMN-673) plus carboplatin plus paclitaxel                              | Advanced <i>BRCA</i> -mutated solid tumor or metastatic TNBC                           | (NCT02358200)                     | I    | January 8, 2019  | Terminated                                                  | ORR                                    |
| Rucaparib                                                                           | HER2-negative MBC with a <i>BRCAness</i>                                               | RUBY (NCT02505048)                | II   | February, 2019   | Active, not recruiting<br>Reported by Patsouris et al. [24] | CBR                                    |
| Niraparib plus pembrolizumab                                                        | Advanced or metastatic TNBC or recurrent ovarian cancer                                | TOPACIO/KEYNOTE-162 (NCT02657889) | I/II | May 14, 2018     | Published by Vinayak et al. [25]                            | Number of subjects reporting DLTs, ORR |

**Abbreviations:** HR, hormone receptor; HER2, human epidermal growth factor receptor 2; TN, triple negative; TNBC, triple negative breast cancer; BC, breast cancer; BM, brain metastasis; BCBM, breast cancer brain metastasis; MBC, metastatic breast cancer; SRS, stereotactic radiosurgery; CNS, central nervous system; CAR, Chimeric Antigen Receptors; CSF, cerebrospinal fluid; OS, overall survival; PFS, progression-free survival; ORR, objective response rate; RRR, radiographic response rate; CBR, clinical benefit rate; CR, complete response; T-DM1, trastuzumab emtansine; MRI, magnetic resonance imaging; PDX, patient-derived xenograft; MTD, maximum tolerated dose; DLTs, dose limiting toxicities



## References

1. Brown, P.D.; Pugh, S.; Laack, N.N.; Wefel, J.S.; Khuntia, D.; Meyers, C.; Choucair, A.; Fox, S.; Suh, J.H.; Roberge, D.; et al. Memantine for the prevention of cognitive dysfunction in patients receiving whole-brain radiotherapy: A randomized, double-blind, placebo-controlled trial. *Neuro. Oncol.* **2013**, *15*, 1429–1437, doi:10.1093/neu-onc/not114.
2. Brown, P.D.; Gondi, V.; Pugh, S.; Tome, W.A.; Wefel, J.S.; Armstrong, T.S.; Bovi, J.A.; Robinson, C.; Konski, A.; Khuntia, D.; et al. Hippocampal Avoidance During Whole-Brain Radiotherapy Plus Memantine for Patients With Brain Metastases: Phase III Trial NRG Oncology CC001. *J. Clin. Oncol.* **2020**, *38*, 1019–1029, doi:10.1200/jco.19.02767.
3. Cameron, D.; Casey, M.; Press, M.; Lindquist, D.; Pienkowski, T.; Romieu, C.G.; Chan, S.; Jagiello-Gruszfeld, A.; Kaufman, B.; Crown, J.; et al. A phase III randomized comparison of lapatinib plus capecitabine versus capecitabine alone in women with advanced breast cancer that has progressed on trastuzumab: Updated efficacy and biomarker analyses. *Breast Cancer Res. Treat.* **2008**, *112*, 533–543, doi:10.1007/s10549-007-9885-0.
4. Lin, N.U.; Eierman, W.; Greil, R.; Campone, M.; Kaufman, B.; Steplewski, K.; Lane, S.R.; Zembryki, D.; Rubin, S.D.; Winer, E.P. Randomized phase II study of lapatinib plus capecitabine or lapatinib plus topotecan for patients with HER2-positive breast cancer brain metastases. *J. Neurooncol.* **2011**, *105*, 613–620, doi:10.1007/s11060-011-0629-y.
5. Gelmon, K.A.; Boyle, F.M.; Kaufman, B.; Huntsman, D.G.; Manikhas, A.; Di Leo, A.; Martin, M.; Schwartzberg, L.S.; Lemieux, J.; Aparicio, S.; et al. Lapatinib or Trastuzumab Plus Taxane Therapy for Human Epidermal Growth Factor Receptor 2–Positive Advanced Breast Cancer: Final Results of NCIC CTG MA.31. *J. Clin. Oncol.* **2015**, *33*, 1574–1583, doi:10.1200/jco.2014.56.9590.
6. Pivot, X.; Manikhas, A.; Żurawski, B.; Chmielowska, E.; Karaszewska, B.; Allerton, R.; Chan, S.; Fabi, A.; Bidoli, P.; Gori, S.; et al. CEREBEL (EGF111438): A Phase III, Randomized, Open-Label Study of Lapatinib Plus Capecitabine Versus Trastuzumab Plus Capecitabine in Patients With Human Epidermal Growth Factor Receptor 2–Positive Metastatic Breast Cancer. *J. Clin. Oncol.* **2015**, *33*, 1564–1573, doi:10.1200/jco.2014.57.1794.
7. Morikawa, A.; De Stanchina, E.; Pentsova, E.; Kemeny, M.M.; Li, B.T.; Tang, K.; Patil, S.; Fleisher, M.; Van Poznak, C.; Norton, L.; et al. Phase I Study of Intermittent High-Dose Lapatinib Alternating with Capecitabine for HER2-Positive Breast Cancer Patients with Central Nervous System Metastases. *Clin. Cancer Res.* **2019**, *25*, 3784–3792, doi:10.1158/1078-0432.ccr-18-3502.
8. Hurvitz, S.; Singh, R.; Adams, B.; Taguchi, J.A.; Chan, D.; Dichmann, R.A.; Castrellon, A.; Hu, E.; Berkowitz, J.; Mani, A.; et al. Phase Ib/II single-arm trial evaluating the combination of everolimus, lapatinib and capecitabine for the treatment of HER2-positive breast cancer with brain metastases (TRIO-US B-09). *Ther. Adv. Med. Oncol.* **2018**, *10*, 175883591880733, doi:10.1177/1758835918807339.
9. Kim, I.A.; Moughan, J.; Sperduto, P.W.; De Los Santos, J.F.; Peereboom, D.; Ogunleye, T.B.; Boulter, D.; Cho, K.H.; Shin, K.H.; Zoberi, I.; et al. NRG Oncology/RTOG 1119: PHASE II Randomized Study of Whole Brain Radiotherapy/Stereotactic Radiosurgery with Concurrent Lapatinib in Patients with Brain Metastases from HER2-Positive Breast Cancer—A Collaborative Study of NRG and KROG (NCT01622868). *International Journal of Radiation Oncology\*Biophysics* **2020**, *108*, S174-S175, doi:10.1016/j.ijrobp.2020.07.953.
10. Borges, V.F.; Ferrario, C.; Aucoin, N.; Falkson, C.; Khan, Q.; Krop, I.; Welch, S.; Conlin, A.; Chaves, J.; Bedard, P.L.; et al. Tucatinib Combined With Ado-Trastuzumab Emtansine in Advanced ERBB2/HER2-Positive Metastatic Breast Cancer. *JAMA Oncology* **2018**, *4*, 1214, doi:10.1001/jamaoncol.2018.1812.
11. Chan, A.; Moy, B.; Mansi, J.; Ejlertsen, B.; Holmes, F.A.; Chia, S.; Iwata, H.; Gnant, M.; Loibl, S.; Barrios, C.H.; et al. Final Efficacy Results of Neratinib in HER2-positive Hormone Receptor-positive Early-stage Breast Cancer From the Phase III ExteNET Trial. *Clin. Breast Cancer* **2020**, 10.1016/j.clbc.2020.09.014, doi:10.1016/j.clbc.2020.09.014.
12. Bates, S.E.; Lindenberg, M.L.; Bryla, C.; Pichun, M.E.B.; Patronas, N.; Amiri-Kordestani, L.; Gonzalez, E.M.; Fojo, T.; Balasubramaniam, S.; Choyke, P.L. ANG1005 for brain metastases from breast cancer: 18F-FLT-PET and MRI as complementary approaches to response assessment. *J. Clin. Oncol.* **2015**, *33*, 2552–2552, doi:10.1200/jco.2015.33.15\_suppl.2552.
13. Van Swearingen, A.E.D.; Siegel, M.B.; Deal, A.M.; Sambade, M.J.; Hoyle, A.; Hayes, D.N.; Jo, H.; Little, P.; Dees, E.C.; Muss, H.; et al. LCCC 1025: A phase II study of everolimus, trastuzumab, and vinorelbine to treat progressive HER2-positive breast cancer brain metastases. *Breast Cancer Res. Treat.* **2018**, *171*, 637–648, doi:10.1007/s10549-

018-4852-5.

14. Jerusalem, G.; De Boer, R.H.; Hurvitz, S.; Yardley, D.A.; Kovalenko, E.; Ejlertsen, B.; Blau, S.; Özgüroglu, M.; Landherr, L.; Ewertz, M.; et al. Everolimus Plus Exemestane vs Everolimus or Capecitabine Monotherapy for Estrogen Receptor-Positive, HER2-Negative Advanced Breast Cancer. *JAMA Oncology* **2018**, *4*, 1367, doi:10.1001/jamaoncol.2018.2262.
15. Tolaney, S.; Forero-Torres, A.; Boni, V.; Bachelot, T.; Lu, Y.-S.; Maur, M.; Fasolo, A.; Motta, M.; Pan, C.; Dobson, J.; et al. Abstract P4-22-12: Ribociclib + fulvestrant in postmenopausal women with HR+, HER2- advanced breast cancer (ABC). *Cancer Res.* **2017**, *77*, P4-22-12-P24-22-12, doi:10.1158/1538-7445.Sabcs16-p4-22-12.
16. Baselga, J.; Im, S.A.; Iwata, H.; Cortés, J.; De Laurentiis, M.; Jiang, Z.; Arteaga, C.L.; Jonat, W.; Clemons, M.; Ito, Y.; et al. Buparlisib plus fulvestrant versus placebo plus fulvestrant in postmenopausal, hormone receptor-positive, HER2-negative, advanced breast cancer (BELLE-2): A randomised, double-blind, placebo-controlled, phase 3 trial. *Lancet Oncol.* **2017**, *18*, 904–916, doi:10.1016/s1470-2045(17)30376-5.
17. McRee, A.J.; Marcom, P.K.; Moore, D.T.; Zamboni, W.C.; Kornblum, Z.A.; Hu, Z.; Phipps, R.; Anders, C.K.; Reeder-Hayes, K.; Carey, L.A.; et al. A Phase I Trial of the PI3K Inhibitor Buparlisib Combined With Capecitabine in Patients With Metastatic Breast Cancer. *Clin. Breast Cancer* **2018**, *18*, 289–297, doi:10.1016/j.clbc.2017.10.014.
18. Cortes, J.; Cescon, D.W.; Rugo, H.S.; Nowecki, Z.; Im, S.-A.; Yusof, M.M.; Gallardo, C.; Lipatov, O.; Barrios, C.H.; Holgado, E.; et al. KEYNOTE-355: Randomized, double-blind, phase III study of pembrolizumab + chemotherapy versus placebo + chemotherapy for previously untreated locally recurrent inoperable or metastatic triple-negative breast cancer. *J. Clin. Oncol.* **2020**, *38*, 1000, doi:10.1200/JCO.2020.38.15\_suppl.1000.
19. Miles, D.; André, F.; Gligorov, J.; Verma, S.; Xu, B.; Cameron, D.; Barrios, C.; Schneeweiss, A.; Easton, V.; Ghazi, Y.; et al. Abstract OT1-01-01: IMpassion131: A phase III study comparing 1L atezolizumab with paclitaxel vs placebo with paclitaxel in treatment-naive patients with inoperable locally advanced or metastatic triple negative breast cancer (TNBC). *Cancer Res.* **2018**, *78*, OT1-01-01-OT01-01-01, doi:10.1158/1538-7445.Sabcs17-ot1-01-01.
20. Cortés, J.; Rugo, H.S.; Awada, A.; Twelves, C.; Perez, E.A.; Im, S.A.; Gómez-Pardo, P.; Schwartzberg, L.S.; Diéras, V.; Yardley, D.A.; et al. Prolonged survival in patients with breast cancer and a history of brain metastases: Results of a preplanned subgroup analysis from the randomized phase III BEACON trial. *Breast Cancer Res. Treat.* **2017**, *165*, 329–341, doi:10.1007/s10549-017-4304-7.
21. Tripathy, D.; Tolaney, S.M.; Seidman, A.D.; Anders, C.K.; Ibrahim, N.; Rugo, H.S.; Twelves, C.; Dieras, V.; Müller, V.; Tagliaferri, M.; et al. ATTAIN: Phase III study of etirinotecan pegol versus treatment of physician's choice in patients with metastatic breast cancer and brain metastases. *Future Oncology* **2019**, *15*, 2211–2225, doi:10.2217/fon-2019-0180.
22. Diéras, V.; Han, H.S.; Kaufman, B.; Wildiers, H.; Friedlander, M.; Ayoub, J.-P.; Puhalla, S.L.; Bondarenko, I.; Campone, M.; Jakobsen, E.H.; et al. Veliparib with carboplatin and paclitaxel in BRCA-mutated advanced breast cancer (BROCADE3): A randomised, double-blind, placebo-controlled, phase 3 trial. *The Lancet Oncology* **2020**, *21*, 1269–1282, doi:10.1016/s1470-2045(20)30447-2.
23. Sharma, P.; Rodler, E.; Barlow, W.E.; Gralow, J.; Huggins-Puhalla, S.L.; Anders, C.K.; Goldstein, L.J.; Brown-Glaberman, U.A.; Huynh, T.-T.; Szyarto, C.S.; et al. Results of a phase II randomized trial of cisplatin +/- veliparib in metastatic triple-negative breast cancer (TNBC) and/or germline BRCA-associated breast cancer (SWOG S1416). *J. Clin. Oncol.* **2020**, *38*, 1001–1001, doi:10.1200/JCO.2020.38.15\_suppl.1001.
24. Patsouris, A.; Tredan, O.; Nenciu, D.; Tran-Dien, A.; Campion, L.; Goncalves, A.; Arnedos, M.; Sablin, M.-P.; Gouraud, W.; Jimenez, M.; et al. RUBY: A phase II study testing rucaparib in germline (g) BRCA wild-type patients presenting metastatic breast cancer (mBC) with homologous recombination deficiency (HRD). *J. Clin. Oncol.* **2019**, *37*, 1092–1092, doi:10.1200/JCO.2019.37.15\_suppl.1092.
25. Vinayak, S.; Tolaney, S.M.; Schwartzberg, L.; Mita, M.; McCann, G.; Tan, A.R.; Wahner-Hendrickson, A.E.; Forero, A.; Anders, C.; Wulf, G.M.; et al. Open-label Clinical Trial of Niraparib Combined With Pembrolizumab for Treatment of Advanced or Metastatic Triple-Negative Breast Cancer. *JAMA Oncology* **2019**, *5*, 1132, doi:10.1001/jamaoncol.2019.1029.
